# Supplementary material for: Pancancer Analysis Revealed the Value of RAC2 in Immunotherapy and Cancer Stem Cell
Source: Hindawi journal article supplement (doi:10.1155/2023/8485726), 2023-05-12

|        | ACC    | BLCA   | BRCA   | CESC   | CHOL   | COAD   | DLBC   | ESCA   | GBM    | HNSC   | KICH   | KIRC   | KIRP   | LAML   | LGG    | LIHC   | LUAD   | LUSC   | MESO   | OV     | PAAD   | PCPG   | PRAD   | READ   | SARC   | SKCM   | STAD   | TGCT   | THCA   | THYM   | UCEC   | UCS    | UVM    |
|--------|--------|--------|--------|--------|--------|--------|--------|--------|--------|--------|--------|--------|--------|--------|--------|--------|--------|--------|--------|--------|--------|--------|--------|--------|--------|--------|--------|--------|--------|--------|--------|--------|--------|
| CCR1   | <0.001 | <0.001 | <0.001 | <0.001 | <0.001 | <0.001 | 0.068  | <0.001 | <0.001 | <0.001 | <0.001 | <0.001 | <0.001 | <0.001 | <0.001 | <0.001 | <0.001 | <0.001 | <0.001 | <0.001 | <0.001 | <0.001 | <0.001 | <0.001 | <0.001 | <0.001 | <0.001 | <0.001 | <0.001 | <0.001 | <0.001 | <0.001 |        |
| CCR2   | <0.001 | <0.001 | <0.001 | <0.001 | 0.017  | <0.001 | 0.118  | 0.006  | <0.001 | <0.001 | <0.001 | <0.001 | <0.001 | 0.003  | <0.001 | <0.001 | <0.001 | <0.001 | <0.001 | <0.001 | <0.001 | <0.001 | <0.001 | <0.001 | <0.001 | <0.001 | <0.001 | <0.001 | <0.001 | <0.001 | <0.001 | <0.001 |        |
| CCR3   | 0.001  | 0.614  | <0.001 | <0.001 | 0.099  | <0.001 | 0.319  | <0.001 | <0.001 | <0.001 | <0.001 | <0.001 | <0.001 | <0.001 | <0.001 | <0.001 | 0.193  | <0.001 | <0.001 | <0.001 | <0.001 | <0.001 | <0.001 | <0.001 | <0.001 | <0.001 | <0.001 | <0.001 | 0.293  | 0.055  | 0.008  | 0.005  |        |
| CCR4   | <0.001 | <0.001 | <0.001 | <0.001 | 0.010  | <0.001 | 0.150  | 0.006  | <0.001 | <0.001 | <0.001 | <0.001 | <0.001 | 0.571  | <0.001 | <0.001 | <0.001 | <0.001 | 0.001  | <0.001 | <0.001 | <0.001 | <0.001 | <0.001 | <0.001 | <0.001 | <0.001 | <0.001 | <0.001 | <0.001 | 0.080  | <0.001 |        |
| CCR5   | <0.001 | <0.001 | <0.001 | <0.001 | 0.002  | <0.001 | 0.049  | <0.001 | <0.001 | <0.001 | <0.001 | <0.001 | <0.001 | <0.001 | <0.001 | <0.001 | <0.001 | <0.001 | <0.001 | <0.001 | <0.001 | <0.001 | <0.001 | <0.001 | <0.001 | <0.001 | <0.001 | <0.001 | <0.001 | <0.001 | <0.001 | <0.001 |        |
| CCR6   | 0.234  | <0.001 | <0.001 | <0.001 | 0.038  | <0.001 | <0.001 | 0.287  | <0.001 | <0.001 | <0.001 | <0.001 | <0.001 | 0.038  | <0.001 | <0.001 | <0.001 | <0.001 | 0.003  | <0.001 | <0.001 | <0.001 | 0.019  | <0.001 | <0.001 | <0.001 | <0.001 | <0.001 | <0.001 | <0.001 | 0.362  | <0.001 |        |
| CCR7   | <0.001 | 0.763  | <0.001 | <0.001 | 0.009  | <0.001 | 0.012  | 0.039  | <0.001 | <0.001 | <0.001 | <0.001 | <0.001 | 0.206  | <0.001 | <0.001 | <0.001 | <0.001 | <0.001 | <0.001 | <0.001 | <0.001 | <0.001 | <0.001 | <0.001 | <0.001 | <0.001 | <0.001 | <0.001 | <0.001 | 0.005  | <0.001 |        |
| CCR8   | <0.001 | <0.001 | <0.001 | <0.001 | 0.125  | <0.001 | 0.149  | <0.001 | <0.001 | <0.001 | <0.001 | <0.001 | <0.001 | 0.207  | <0.001 | <0.001 | <0.001 | <0.001 | <0.001 | <0.001 | <0.001 | <0.001 | <0.001 | <0.001 | <0.001 | <0.001 | 0.022  | <0.001 | <0.001 | <0.001 | 0.061  | <0.001 |        |
| CCR9   | 0.017  | 0.383  | <0.001 | 0.092  | 0.465  | 0.002  | 0.030  | 0.981  | 0.050  | 0.005  | 0.408  | <0.001 | 0.292  | 0.045  | 0.005  | <0.001 | <0.001 | <0.001 | 0.149  | <0.001 | <0.001 | <0.001 | <0.001 | 0.106  | 0.010  | <0.001 | <0.001 | <0.001 | <0.001 | 0.087  | 0.478  | 0.031  |        |
| CCR10  | 0.610  | 0.615  | <0.001 | 0.542  | 0.666  | <0.001 | 0.194  | 0.160  | 0.476  | 0.176  | 0.119  | 0.017  | <0.001 | 0.036  | <0.001 | <0.001 | 0.191  | <0.001 | 0.808  | 0.849  | 0.007  | 0.063  | <0.001 | <0.001 | <0.001 | <0.001 | 0.788  | <0.001 | 0.418  | <0.001 | 0.598  | <0.001 |        |
| CXCR1  | 0.349  | <0.001 | <0.001 | 0.007  | 0.025  | <0.001 | 0.782  | 0.009  | <0.001 | <0.001 | <0.001 | <0.001 | <0.001 | <0.001 | <0.001 | <0.001 | 0.002  | <0.001 | 0.326  | <0.001 | 0.014  | <0.001 | <0.001 | <0.001 | <0.001 | <0.001 | 0.239  | <0.001 | 0.006  | <0.001 | 0.051  | 0.157  |        |
| CXCR2  | <0.001 | 0.012  | <0.001 | <0.001 | 0.037  | <0.001 | 0.299  | 0.989  | <0.001 | 0.918  | <0.001 | <0.001 | <0.001 | <0.001 | <0.001 | <0.001 | <0.001 | <0.001 | 0.059  | <0.001 | 0.002  | <0.001 | <0.001 | <0.001 | <0.001 | 0.001  | 0.011  | <0.001 | 0.481  | <0.001 | 0.029  | 0.015  |        |
| CXCR3  | <0.001 | <0.001 | <0.001 | <0.001 | 0.004  | <0.001 | 0.047  | 0.023  | <0.001 | <0.001 | <0.001 | <0.001 | <0.001 | 0.020  | <0.001 | <0.001 | <0.001 | <0.001 | <0.001 | <0.001 | <0.001 | <0.001 | 0.067  | <0.001 | <0.001 | <0.001 | <0.001 | <0.001 | 0.602  | <0.001 | <0.001 | <0.001 |        |
| CXCR4  | 0.015  | <0.001 | <0.001 | 0.064  | 0.001  | <0.001 | 0.085  | 0.062  | <0.001 | <0.001 | <0.001 | <0.001 | <0.001 | 0.001  | <0.001 | <0.001 | <0.001 | <0.001 | <0.001 | 0.133  | <0.001 | <0.001 | <0.001 | <0.001 | <0.001 | <0.001 | <0.001 | <0.001 | <0.001 | 0.004  | 0.293  | 0.008  |        |
| CXCR5  | 0.314  | <0.001 | <0.001 | <0.001 | 0.108  | <0.001 | 0.006  | 0.020  | 0.055  | <0.001 | <0.001 | <0.001 | <0.001 | 0.187  | <0.001 | <0.001 | <0.001 | <0.001 | 0.007  | <0.001 | <0.001 | <0.001 | <0.001 | 0.019  | <0.001 | <0.001 | <0.001 | <0.001 | <0.001 | 0.021  | <0.001 | 0.029  | <0.001 |
| CXCR6  | <0.001 | <0.001 | <0.001 | <0.001 | 0.003  | <0.001 | 0.093  | <0.001 | <0.001 | <0.001 | <0.001 | <0.001 | <0.001 | 0.149  | <0.001 | <0.001 | <0.001 | <0.001 | <0.001 | <0.001 | <0.001 | <0.001 | <0.001 | <0.001 | <0.001 | <0.001 | <0.001 | <0.001 | <0.001 | <0.001 | 0.002  | <0.001 |        |
| XCR1   | <0.001 | 0.715  | <0.001 | <0.001 | 0.032  | <0.001 | 0.008  | 0.049  | <0.001 | 0.003  | <0.001 | <0.001 | <0.001 | 0.634  | <0.001 | <0.001 | <0.001 | <0.001 | <0.001 | <0.001 | <0.001 | <0.001 | <0.001 | <0.001 | <0.001 | <0.001 | <0.001 | <0.001 | <0.001 | <0.001 | <0.001 | <0.001 |        |
| CX3CR1 | 0.002  | <0.001 | <0.001 | <0.001 | 0.423  | <0.001 | 0.107  | 0.003  | <0.001 | <0.001 | <0.001 | <0.001 | <0.001 | <0.001 | <0.001 | <0.001 | <0.001 | <0.001 | 0.557  | <0.001 | 0.132  | 0.003  | <0.001 | <0.001 | <0.001 | <0.001 | 0.023  | <0.001 | 0.003  | <0.001 | 0.908  | 0.218  |        |

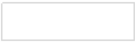



Supplement: f1 [file 8485726.f1.zip]
