# Supplementary material for: Pancancer Analysis Revealed the Value of RAC2 in Immunotherapy and Cancer Stem Cell
Source: Hindawi journal article supplement (doi:10.1155/2023/8485726), 2023-05-12

|        | ACC    | BLCA   | BRCA   | CESC   | CHOL   | COAD   | DLBC  | ESCA   | GBM    | HNSC   | KICH   | KIRC   | KIRP   | LAML   | LGG    | LIHC   | LUAD   | LUSC   | MESO   | OV     | PAAD   | PCPG   | PRAD   | READ   | SARC   | SKCM   | STAD   | TGCT   | THCA   | THYM   | UCEC   | UCS    | UVM    |
|--------|--------|--------|--------|--------|--------|--------|-------|--------|--------|--------|--------|--------|--------|--------|--------|--------|--------|--------|--------|--------|--------|--------|--------|--------|--------|--------|--------|--------|--------|--------|--------|--------|--------|
| CCL1   | 0.262  | <0.001 | <0.001 | <0.001 | 0.042  | <0.001 | 0.675 | 0.024  | 0.235  | <0.001 | <0.001 | <0.001 | 0.003  | 0.468  | <0.001 | <0.001 | <0.001 | <0.001 | <0.001 | <0.001 | 0.001  | <0.001 | <0.001 | 0.315  | <0.001 | <0.001 | <0.001 | <0.001 | <0.001 | 0.163  | <0.001 | 0.090  | 0.009  |
| CCL2   | <0.001 | <0.001 | <0.001 | <0.001 | 0.057  | <0.001 | 0.949 | <0.001 | <0.001 | <0.001 | <0.001 | 0.013  | <0.001 | 0.594  | <0.001 | <0.001 | <0.001 | <0.001 | <0.001 | 0.833  | <0.001 | 0.043  | <0.001 | <0.001 | <0.001 | <0.001 | <0.001 | 0.004  | <0.001 | 0.003  | <0.001 | 0.106  | 0.006  |
| CCL3   | <0.001 | <0.001 | <0.001 | <0.001 | 0.007  | <0.001 | 0.970 | <0.001 | <0.001 | <0.001 | <0.001 | <0.001 | <0.001 | <0.001 | <0.001 | <0.001 | <0.001 | <0.001 | <0.001 | <0.001 | <0.001 | <0.001 | <0.001 | <0.001 | <0.001 | <0.001 | <0.001 | <0.001 | <0.001 | 0.046  | <0.001 | 0.009  | <0.001 |
| CCL4   | <0.001 | <0.001 | <0.001 | <0.001 | 0.008  | <0.001 | 0.128 | <0.001 | <0.001 | <0.001 | <0.001 | <0.001 | <0.001 | 0.770  | <0.001 | <0.001 | <0.001 | <0.001 | <0.001 | <0.001 | <0.001 | <0.001 | <0.001 | <0.001 | <0.001 | <0.001 | <0.001 | <0.001 | <0.001 | <0.001 | 0.003  | <0.001 |        |
| CCL5   | <0.001 | <0.001 | <0.001 | <0.001 | 0.021  | <0.001 | 0.714 | <0.001 | <0.001 | <0.001 | <0.001 | <0.001 | <0.001 | <0.001 | <0.001 | <0.001 | <0.001 | <0.001 | <0.001 | <0.001 | <0.001 | <0.001 | <0.001 | <0.001 | <0.001 | <0.001 | <0.001 | <0.001 | <0.001 | <0.001 | <0.001 | <0.001 |        |
| CCL7   | 0.002  | <0.001 | <0.001 | <0.001 | 0.176  | <0.001 | 0.631 | <0.001 | <0.001 | <0.001 | <0.001 | <0.001 | <0.001 | 0.014  | <0.001 | <0.001 | <0.001 | <0.001 | <0.001 | 0.335  | <0.001 | <0.001 | <0.001 | 0.019  | <0.001 | <0.001 | 0.115  | 0.112  | <0.001 | <0.001 | <0.001 | 0.569  | 0.958  |
| CCL8   | <0.001 | <0.001 | <0.001 | <0.001 | 0.061  | <0.001 | 0.119 | <0.001 | <0.001 | <0.001 | <0.001 | <0.001 | <0.001 | 0.171  | <0.001 | <0.001 | <0.001 | <0.001 | <0.001 | <0.001 | 0.003  | <0.001 | <0.001 | <0.001 | <0.001 | <0.001 | <0.001 | <0.001 | <0.001 | <0.001 | <0.001 | <0.001 |        |
| CCL11  | 0.074  | <0.001 | <0.001 | 0.019  | 0.650  | <0.001 | 0.045 | 0.002  | 0.016  | 0.301  | <0.001 | <0.001 | 0.014  | 0.728  | 0.034  | <0.001 | <0.001 | <0.001 | <0.001 | 0.699  | <0.001 | <0.001 | <0.001 | <0.001 | 0.002  | 0.001  | <0.001 | 0.042  | <0.001 | 0.439  | <0.001 | 0.783  | 0.164  |
| CCL13  | <0.001 | <0.001 | <0.001 | <0.001 | 0.212  | <0.001 | 0.149 | <0.001 | <0.001 | <0.001 | <0.001 | <0.001 | <0.001 | 0.174  | 0.060  | <0.001 | <0.001 | <0.001 | <0.001 | 0.002  | <0.001 | <0.001 | <0.001 | <0.001 | <0.001 | <0.001 | <0.001 | 0.002  | <0.001 | 0.244  | <0.001 | <0.001 | 0.008  |
| CCL14  | 0.001  | 0.503  | <0.001 | 0.703  | 0.508  | 0.376  | 0.039 | 0.048  | 0.092  | 0.845  | <0.001 | 0.337  | 0.059  | 0.043  | <0.001 | 0.002  | <0.001 | <0.001 | 0.230  | 0.001  | 0.053  | <0.001 | <0.001 | 0.923  | 0.052  | <0.001 | 0.004  | 0.981  | <0.001 | 0.448  | <0.001 | 0.067  | 0.015  |
| CCL15  | 0.004  | <0.001 | <0.001 | 0.424  | 0.668  | 0.063  | 0.786 | 0.018  | 0.101  | 0.899  | 0.060  | 0.952  | 0.001  | 0.059  | 0.005  | <0.001 | 0.134  | <0.001 | 0.135  | 0.202  | 0.685  | 0.108  | <0.001 | 0.027  | <0.001 | <0.001 | 0.003  | 0.580  | 0.390  | 0.809  | 0.115  | 0.143  | 0.482  |
| CCL16  | <0.001 | 0.440  | <0.001 | 0.108  | 0.878  | 0.037  | 0.085 | 0.023  | 0.849  | 0.018  | 0.002  | 0.909  | 0.411  | 0.136  | <0.001 | <0.001 | <0.001 | <0.001 | 0.202  | 0.241  | 0.059  | <0.001 | <0.001 | 0.775  | 0.048  | <0.001 | 0.103  | 0.830  | <0.001 | 0.004  | 0.003  | 0.226  | 0.028  |
| CCL17  | 0.007  | <0.001 | <0.001 | 0.357  | 0.720  | <0.001 | 0.326 | 0.056  | 0.132  | <0.001 | <0.001 | <0.001 | <0.001 | 0.491  | <0.001 | <0.001 | <0.001 | <0.001 | 0.179  | <0.001 | <0.001 | <0.001 | <0.001 | <0.001 | <0.001 | 0.020  | <0.001 | <0.001 | <0.001 | <0.001 | <0.001 | 0.011  | 0.110  |
| CCL18  | 0.125  | <0.001 | <0.001 | <0.001 | 0.105  | <0.001 | 0.519 | <0.001 | <0.001 | <0.001 | <0.001 | <0.001 | <0.001 | 0.156  | <0.001 | <0.001 | <0.001 | <0.001 | <0.001 | <0.001 | <0.001 | <0.001 | <0.001 | <0.001 | <0.001 | <0.001 | <0.001 | <0.001 | <0.001 | <0.001 | <0.001 | <0.001 | 0.002  |
| CCL19  | <0.001 | <0.001 | <0.001 | <0.001 | 0.033  | <0.001 | 0.392 | 0.109  | 0.001  | <0.001 | <0.001 | <0.001 | <0.001 | 0.043  | <0.001 | <0.001 | <0.001 | <0.001 | 0.004  | <0.001 | <0.001 | <0.001 | <0.001 | <0.001 | <0.001 | <0.001 | <0.001 | <0.001 | <0.001 | 0.092  | <0.001 | 0.031  | 0.007  |
| CCL20  | 0.267  | <0.001 | <0.001 | 0.044  | 0.138  | 0.583  | 0.970 | 0.248  | <0.001 | <0.001 | <0.001 | <0.001 | <0.001 | 0.248  | <0.001 | <0.001 | 0.018  | <0.001 | 0.267  | <0.001 | 0.001  | <0.001 | <0.001 | 0.608  | <0.001 | <0.001 | 0.207  | 0.060  | <0.001 | <0.001 | 0.072  | 0.759  | 0.025  |
| CCL21  | 0.001  | <0.001 | <0.001 | <0.001 | <0.001 | <0.001 | 0.911 | <0.001 | 0.866  | <0.001 | 0.013  | <0.001 | <0.001 | 0.014  | <0.001 | <0.001 | <0.001 | <0.001 | 0.010  | <0.001 | <0.001 | <0.001 | <0.001 | 0.001  | <0.001 | <0.001 | <0.001 | <0.001 | <0.001 | 0.817  | <0.001 | 0.207  | 0.121  |
| CCL22  | 0.205  | <0.001 | <0.001 | <0.001 | 0.254  | <0.001 | 0.470 | <0.001 | <0.001 | <0.001 | <0.001 | <0.001 | <0.001 | 0.003  | <0.001 | <0.001 | <0.001 | <0.001 | <0.001 | <0.001 | <0.001 | <0.001 | <0.001 | <0.001 | <0.001 | <0.001 | <0.001 | <0.001 | <0.001 | <0.001 | <0.001 | <0.001 | <0.001 |
| CCL23  | <0.001 | <0.001 | <0.001 | <0.001 | 0.009  | <0.001 | 0.531 | 0.153  | <0.001 | <0.001 | <0.001 | <0.001 | <0.001 | <0.001 | <0.001 | <0.001 | <0.001 | <0.001 | <0.001 | <0.001 | <0.001 | <0.001 | <0.001 | <0.001 | <0.001 | <0.001 | <0.001 | <0.001 | <0.001 | 0.029  | <0.001 | <0.001 | 0.002  |
| CCL24  | 0.018  | <0.001 | <0.001 | 0.009  | 0.403  | 0.015  | 0.669 | 0.023  | 0.002  | <0.001 | <0.001 | <0.001 | <0.001 | 0.096  | 0.664  | <0.001 | <0.001 | <0.001 | <0.001 | <0.001 | 0.022  | <0.001 | <0.001 | 0.959  | <0.001 | <0.001 | <0.001 | <0.001 | <0.001 | 0.031  | 0.055  | 0.038  | <0.001 |
| CCL25  | 0.002  | <0.001 | <0.001 | <0.001 | 0.519  | <0.001 | 0.315 | 0.204  | <0.001 | 0.002  | 0.047  | <0.001 | <0.001 | 0.067  | <0.001 | 0.766  | <0.001 | <0.001 | 0.574  | 0.001  | 0.027  | 0.086  | 0.753  | 0.005  | 0.641  | <0.001 | <0.001 | 0.787  | <0.001 | 0.006  | <0.001 | 0.138  | 0.001  |
| CCL26  | 0.505  | <0.001 | <0.001 | 0.450  | 0.060  | <0.001 | 0.933 | 0.008  | <0.001 | 0.386  | <0.001 | <0.001 | <0.001 | 0.537  | <0.001 | <0.001 | <0.001 | 0.007  | 0.465  | <0.001 | 0.077  | <0.001 | <0.001 | 0.716  | <0.001 | <0.001 | 0.073  | 0.769  | <0.001 | 0.042  | 0.776  | 0.920  | <0.001 |
| CCL27  | 0.208  | 0.120  | 0.979  | 0.216  |        | 0.559  | 0.300 | 0.467  | 0.682  | 0.010  | 0.833  | 0.920  | 0.367  | 0.560  | <0.001 | 0.213  | 0.907  | 0.004  | 0.214  | 0.269  | 0.205  | 0.499  | 0.025  | 0.305  | 0.490  | 0.333  | 0.545  | 0.654  | 0.286  | 0.664  | 0.275  | 0.800  | 0.299  |
| CXCL1  | <0.001 | <0.001 | <0.001 | 0.540  | 0.029  | <0.001 | 0.781 | 0.044  | <0.001 | <0.001 | <0.001 | <0.001 | <0.001 | 0.001  | 0.010  | <0.001 | <0.001 | 0.004  | 0.799  | <0.001 | 0.016  | <0.001 | <0.001 | 0.001  | <0.001 | 0.022  | 0.201  | 0.648  | <0.001 | <0.001 | 0.001  | 0.112  | 0.010  |
| CXCL2  | 0.001  | <0.001 | <0.001 | <0.001 | 0.138  | 0.007  | 0.475 | 0.989  | <0.001 | <0.001 | <0.001 | 0.091  | <0.001 | 0.416  | <0.001 | <0.001 | 0.005  | <0.001 | 0.818  | <0.001 | 0.075  | <0.001 | <0.001 | 0.008  | <0.001 | <0.001 | 0.831  | 0.689  | <0.001 | 0.070  | 0.474  | 0.006  | <0.001 |
| CXCL3  | 0.007  | <0.001 | <0.001 | 0.324  | 0.094  | 0.024  | 0.350 | 0.871  | <0.001 | <0.001 | <0.001 | <0.001 | <0.001 | 0.157  | <0.001 | <0.001 | 0.010  | <0.001 | 0.145  | <0.001 | 0.060  | <0.001 | <0.001 | 0.039  | <0.001 | <0.001 | 0.373  | 0.745  | <0.001 | <0.001 | 0.360  | 0.007  | 0.002  |
| CXCL5  | 0.011  | <0.001 | <0.001 | 0.059  | 0.134  | <0.001 | 0.626 | 0.040  | <0.001 | 0.236  | 0.004  | <0.001 | <0.001 | 0.849  | 0.603  | <0.001 | 0.233  | <0.001 | 0.072  | <0.001 | 0.013  | <0.001 | <0.001 | 0.012  | <0.001 | <0.001 | 0.895  | <0.001 | <0.001 | 0.049  | 0.509  | 0.119  | 0.051  |
| CXCL6  | 0.003  | <0.001 | <0.001 | 0.005  | 0.001  | <0.001 | 0.967 | 0.042  | <0.001 | 0.026  | 0.046  | 0.001  | <0.001 | 0.091  | <0.001 | <0.001 | <0.001 | 0.281  | 0.638  | <0.001 | 0.279  | 0.002  | <0.001 | 0.006  | <0.001 | 0.013  | 0.231  | 0.242  | <0.001 | 0.103  | 0.007  | 0.801  | 0.934  |
| CXCL8  | 0.153  | <0.001 | 0.018  | 0.288  | 0.020  | <0.001 | 0.166 | 0.014  | <0.001 | <0.001 | <0.001 | <0.001 | <0.001 | 0.149  | <0.001 | <0.001 | 0.042  | 0.129  | 0.954  | <0.001 | 0.001  | <0.001 | <0.001 | <0.001 | <0.001 | 0.019  | 0.850  | 0.046  | <0.001 | 0.006  | 0.485  | 0.236  | <0.001 |
| CXCL9  | <0.001 | <0.001 | <0.001 | <0.001 | 0.008  | <0.001 | 0.033 | <0.001 | <0.001 | <0.001 | <0.001 | <0.001 | <0.001 | 0.417  | <0.001 | <0.001 | <0.001 | <0.001 | <0.001 | <0.001 | <0.001 | <0.001 | <0.001 | <0.001 | <0.001 | <0.001 | <0.001 | <0.001 | <0.001 | <0.001 | <0.001 | 0.012  | <0.001 |
| CXCL10 | <0.001 | <0.001 | <0.001 | <0.001 | 0.010  | <0.001 | 0.129 | <0.001 | <0.001 | <0.001 | <0.001 | <0.001 | <0.001 | 0.003  | <0.001 | <0.001 | <0.001 | <0.001 | <0.001 | <0.001 | <0.001 | <0.001 | <0.001 | <0.001 | <0.001 | <0.001 | <0.001 | <0.001 | <0.001 | <0.001 | <0.001 | <0.001 | <0.001 |
| CXCL11 | <0.001 | <0.001 | <0.001 | <0.001 | 0.007  | <0.001 | 0.109 | <0.001 | 0.004  | <0.001 | <0.001 | <0.001 | <0.001 | 0.125  | <0.001 | <0.001 | <0.001 | <0.001 | <0.001 | <0.001 | 0.018  | <0.001 | <0.001 | 0.015  | <0.001 | <0.001 | <0.001 |        |        |        |        |        |        |

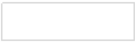



Supplement: f1 [file 8485726.f1.zip]
