# Supplementary material for: Pancancer Analysis Revealed the Value of RAC2 in Immunotherapy and Cancer Stem Cell
Source: Hindawi journal article supplement (doi:10.1155/2023/8485726), 2023-05-12

|          | ACC    | BLCA   | BRCA   | CESC   | CHOL   | COAD   | DLBC   | ESCA   | GBM    | HNSC   | KICH   | KIRC   | KIRP   | LAML   | LGG    | LIHC   | LUAD   | LUSC   | MESO   | OV     | PAAD   | PCPG   | PRAD   | READ   | SARC   | SKCM   | STAD   | TGCT   | THCA   | THYM   | UCEC   | UCS    | UVM    |        |
|----------|--------|--------|--------|--------|--------|--------|--------|--------|--------|--------|--------|--------|--------|--------|--------|--------|--------|--------|--------|--------|--------|--------|--------|--------|--------|--------|--------|--------|--------|--------|--------|--------|--------|--------|
| ADORA2A  | 0.473  | <0.001 | <0.001 | 0.107  | 0.107  | <0.001 | 0.009  | 0.572  | 0.957  | <0.001 | 0.002  | 0.010  | <0.001 | 0.097  | 0.995  | <0.001 | <0.001 | <0.001 | <0.001 | <0.001 | <0.001 | <0.001 | 0.007  | 0.568  | <0.001 | <0.001 | 0.966  | <0.001 | <0.001 | <0.001 | 0.775  | 0.217  |        |        |
| BTLA     | 0.112  | <0.001 | <0.001 | <0.001 | <0.001 | 0.002  | <0.001 | 0.002  | 0.118  | <0.001 | 0.002  | <0.001 | <0.001 | 0.886  | <0.001 | <0.001 | <0.001 | <0.001 | <0.001 | 0.002  | <0.001 | <0.001 | <0.001 | <0.001 | <0.001 | <0.001 | <0.001 | <0.001 | <0.001 | <0.001 | 0.007  | <0.001 |        |        |
| CD160    | 0.148  | <0.001 | <0.001 | <0.001 | <0.001 | <0.001 | 0.002  | 0.436  | 0.163  | <0.001 | <0.001 | <0.001 | <0.001 | 0.128  | <0.001 | <0.001 | <0.001 | <0.001 | 0.683  | <0.001 | 0.138  | <0.001 | <0.001 | 0.510  | 0.010  | <0.001 | <0.001 | <0.001 | <0.001 | <0.001 | <0.001 | 0.855  | <0.001 |        |
| CD244    | <0.001 | <0.001 | <0.001 | <0.001 | <0.001 | 0.012  | 0.039  | <0.001 | <0.001 | <0.001 | <0.001 | <0.001 | <0.001 | 0.006  | <0.001 | <0.001 | <0.001 | <0.001 | 0.172  | <0.001 | <0.001 | <0.001 | <0.001 | <0.001 | <0.001 | <0.001 | <0.001 | <0.001 | <0.001 | <0.001 | 0.001  | 0.002  |        |        |
| CD274    | <0.001 | <0.001 | <0.001 | <0.001 | <0.001 | <0.001 | 0.065  | <0.001 | <0.001 | <0.001 | 0.227  | <0.001 | 0.138  | 0.250  | <0.001 | <0.001 | <0.001 | <0.001 | <0.001 | <0.001 | <0.001 | <0.001 | <0.001 | <0.001 | <0.001 | <0.001 | <0.001 | <0.001 | <0.001 | 0.019  | <0.001 | 0.004  | <0.001 |        |
| CD96     | 0.002  | 0.006  | <0.001 | <0.001 | <0.001 | <0.001 | 0.021  | <0.001 | <0.001 | <0.001 | <0.001 | <0.001 | <0.001 | 0.376  | <0.001 | <0.001 | <0.001 | <0.001 | <0.001 | <0.001 | <0.001 | <0.001 | <0.001 | <0.001 | <0.001 | <0.001 | <0.001 | <0.001 | <0.001 | <0.001 | <0.001 | 0.001  | <0.001 |        |
| CSF1R    | <0.001 | <0.001 | <0.001 | <0.001 | <0.001 | <0.001 | 0.115  | <0.001 | <0.001 | <0.001 | <0.001 | <0.001 | <0.001 | <0.001 | <0.001 | <0.001 | <0.001 | <0.001 | <0.001 | <0.001 | <0.001 | <0.001 | <0.001 | <0.001 | <0.001 | <0.001 | <0.001 | <0.001 | <0.001 | <0.001 | <0.001 | <0.001 | <0.001 |        |
| CTLA4    | <0.001 | <0.001 | <0.001 | <0.001 | <0.001 | <0.001 | 0.202  | <0.001 | <0.001 | <0.001 | <0.001 | <0.001 | <0.001 | 0.274  | <0.001 | <0.001 | <0.001 | <0.001 | <0.001 | <0.001 | <0.001 | <0.001 | <0.001 | <0.001 | <0.001 | <0.001 | <0.001 | <0.001 | <0.001 | <0.001 | <0.001 | 0.006  | <0.001 |        |
| HAVCR2   | <0.001 | <0.001 | <0.001 | <0.001 | <0.001 | <0.001 | 0.640  | <0.001 | <0.001 | <0.001 | <0.001 | <0.001 | 0.009  | <0.001 | <0.001 | <0.001 | <0.001 | <0.001 | <0.001 | <0.001 | <0.001 | <0.001 | <0.001 | <0.001 | <0.001 | <0.001 | <0.001 | <0.001 | <0.001 | <0.001 | <0.001 | <0.001 | <0.001 |        |
| IDO1     | 0.646  | <0.001 | <0.001 | <0.001 | <0.001 | <0.001 | 0.349  | <0.001 | <0.001 | <0.001 | 0.580  | <0.001 | 0.011  | 0.048  | <0.001 | <0.001 | <0.001 | <0.001 | <0.001 | <0.001 | <0.001 | <0.001 | <0.001 | <0.001 | <0.001 | <0.001 | <0.001 | <0.001 | 0.541  | <0.001 | 0.015  | <0.001 |        |        |
| IL10     | <0.001 | <0.001 | <0.001 | <0.001 | <0.001 | 0.165  | 0.022  | <0.001 | <0.001 | <0.001 | <0.001 | <0.001 | <0.001 | 0.002  | <0.001 | <0.001 | <0.001 | <0.001 | 0.001  | <0.001 | <0.001 | <0.001 | <0.001 | <0.001 | <0.001 | <0.001 | <0.001 | <0.001 | <0.001 | 0.844  | <0.001 | 0.002  | <0.001 |        |
| IL10RB   | 0.785  | <0.001 | <0.001 | 0.258  | 0.258  | <0.001 | 0.691  | 0.091  | <0.001 | <0.001 | <0.001 | <0.001 | <0.001 | <0.001 | <0.001 | <0.001 | <0.001 | <0.001 | 0.157  | <0.001 | <0.001 | <0.001 | <0.001 | 0.659  | <0.001 | <0.001 | 0.021  | <0.001 | <0.001 | <0.001 | <0.001 | 0.011  | <0.001 |        |
| KDR      | 0.135  | 0.931  | <0.001 | 0.361  | 0.361  | <0.001 | 0.007  | 0.415  | 0.696  | <0.001 | 0.002  | 0.826  | 0.041  | 0.009  | 0.016  | 0.102  | 0.017  | <0.001 | 0.413  | <0.001 | 0.025  | <0.001 | <0.001 | 0.214  | 0.474  | 0.001  | <0.001 | <0.001 | <0.001 | <0.001 | 0.020  | 0.228  | <0.001 |        |
| KIR2DL1  | 0.003  | <0.001 | <0.001 | <0.001 | <0.001 | <0.001 | 0.334  | <0.001 | 0.033  | <0.001 | <0.001 | <0.001 | <0.001 | 0.247  | 0.007  | <0.001 | <0.001 | <0.001 | 0.287  | <0.001 | 0.090  | <0.001 | <0.001 | 0.484  | <0.001 | <0.001 | <0.001 | <0.001 | <0.001 | <0.001 | 0.023  | <0.001 | 0.753  | 0.006  |
| KIR2DL3  | 0.044  | <0.001 | <0.001 | <0.001 | <0.001 | 0.005  | 0.208  | <0.001 | 0.047  | <0.001 | 0.004  | <0.001 | <0.001 | 0.025  | <0.001 | <0.001 | <0.001 | <0.001 | 0.322  | <0.001 | 0.069  | <0.001 | <0.001 | 0.202  | <0.001 | <0.001 | <0.001 | <0.001 | <0.001 | <0.001 | 0.021  | <0.001 | 0.529  | <0.001 |
| LAG3     | 0.418  | <0.001 | <0.001 | <0.001 | <0.001 | 0.017  | 0.150  | <0.001 | 0.083  | <0.001 | <0.001 | <0.001 | <0.001 | 0.047  | <0.001 | <0.001 | <0.001 | <0.001 | 0.002  | <0.001 | <0.001 | <0.001 | <0.001 | <0.001 | <0.001 | <0.001 | <0.001 | <0.001 | <0.001 | <0.001 | <0.001 | <0.001 | <0.001 |        |
| LGALS9   | <0.001 | <0.001 | <0.001 | 0.060  | 0.060  | <0.001 | 0.865  | 0.836  | <0.001 | <0.001 | <0.001 | <0.001 | <0.001 | <0.001 | <0.001 | <0.001 | <0.001 | <0.001 | <0.001 | <0.001 | <0.001 | <0.001 | <0.001 | <0.001 | <0.001 | <0.001 | <0.001 | <0.001 | <0.001 | <0.001 | <0.001 | <0.001 | <0.001 |        |
| PDCD1    | <0.001 | <0.001 | <0.001 | <0.001 | <0.001 | 0.858  | 0.010  | <0.001 | <0.001 | <0.001 | <0.001 | <0.001 | <0.001 | <0.001 | <0.001 | <0.001 | <0.001 | <0.001 | <0.001 | <0.001 | <0.001 | <0.001 | <0.001 | <0.001 | <0.001 | <0.001 | <0.001 | <0.001 | <0.001 | <0.001 | <0.001 | 0.006  | <0.001 |        |
| PDCD1LG2 | <0.001 | <0.001 | <0.001 | <0.001 | <0.001 | <0.001 | 0.335  | <0.001 | <0.001 | <0.001 | <0.001 | <0.001 | <0.001 | 0.354  | <0.001 | <0.001 | <0.001 | <0.001 | <0.001 | <0.001 | <0.001 | <0.001 | <0.001 | <0.001 | <0.001 | <0.001 | <0.001 | <0.001 | <0.001 | <0.001 | 0.435  | <0.001 | 0.004  | 0.002  |
| TGFB1    | 0.024  | <0.001 | <0.001 | <0.001 | <0.001 | <0.001 | 0.080  | <0.001 | <0.001 | <0.001 | <0.001 | <0.001 | <0.001 | <0.001 | <0.001 | <0.001 | <0.001 | <0.001 | <0.001 | <0.001 | <0.001 | <0.001 | <0.001 | <0.001 | <0.001 | <0.001 | <0.001 | <0.001 | <0.001 | <0.001 | 0.205  | <0.001 | <0.001 | 0.002  |
| TGFBR1   | 0.262  | <0.001 | 0.843  | 0.014  | 0.014  | <0.001 | <0.001 | <0.001 | <0.001 | <0.001 | 0.124  | <0.001 | <0.001 | 0.857  | <0.001 | <0.001 | 0.172  | 0.006  | 0.130  | 0.007  | 0.255  | <0.001 | <0.001 | 0.785  | 0.117  | 0.010  | 0.738  | 0.594  | <0.001 | <0.001 | 0.153  | 0.223  | 0.084  |        |
| TIGIT    | <0.001 | <0.001 | <0.001 | <0.001 | <0.001 | <0.001 | 0.210  | <0.001 | <0.001 | <0.001 | <0.001 | <0.001 | <0.001 | 0.090  | <0.001 | <0.001 | <0.001 | <0.001 | <0.001 | <0.001 | <0.001 | <0.001 | <0.001 | <0.001 | <0.001 | <0.001 | <0.001 | <0.001 | <0.001 | <0.001 | <0.001 | <0.001 | <0.001 |        |
| VTGN1    | 0.584  | <0.001 | 0.538  | <0.001 | <0.001 | <0.001 | 0.419  | 0.749  | 0.281  | 0.866  | 0.026  | 0.381  | 0.004  | 0.581  | 0.500  | <0.001 | 0.889  | <0.001 | 0.069  | <0.001 | 0.584  | 0.866  | <0.001 | 0.083  | <0.001 | <0.001 | 0.298  | <0.001 | <0.001 | 0.008  | 0.526  | 0.378  | 0.210  |        |
| ARG1     | 0.935  | 0.004  | 0.476  | <0.001 | <0.001 | <0.001 | 0.313  | 0.186  | 0.136  | <0.001 | 0.048  | 0.019  | 0.001  | 0.909  | 0.444  | 0.007  | 0.012  | <0.001 | 0.925  | 0.392  | 0.721  | 0.024  | 0.119  | 0.617  | 0.012  | 0.778  | 0.423  | 0.016  | 0.029  | 0.276  | 0.940  | 0.208  | 0.194  |        |
| CD276    | 0.313  | <0.001 | 0.043  | 0.057  | 0.057  | <0.001 | 0.149  | <0.001 | 0.002  | <0.001 | 0.001  | <0.001 | <0.001 | 0.087  | <0.001 | <0.001 | <0.001 | 0.009  | 0.787  | 0.002  | <0.001 | <0.001 | 0.036  | <0.001 | <0.001 | 0.045  | 0.134  | <0.001 | <0.001 | <0.001 | 0.901  | 0.649  | 0.007  |        |
| EDNRB    | 0.696  | 0.030  | <0.001 | 0.183  | 0.183  | <0.001 | 0.027  | 0.576  | <0.001 | 0.013  | 0.229  | 0.016  | 0.091  | 0.135  | 0.009  | 0.138  | 0.081  | <0.001 | 0.047  | 0.426  | 0.006  | <0.001 | <0.001 | 0.214  | 0.140  | <0.001 | <0.001 | 0.046  | <0.001 | <0.001 | 0.710  | 0.312  | <0.001 |        |
| IL12A    | <0.001 | <0.001 | <0.001 | 0.507  | 0.507  | <0.001 | 0.003  | 0.061  | <0.001 | <0.001 | <0.001 | <0.001 | <0.001 | 0.836  | 0.036  | <0.001 | <0.001 | 0.981  | <0.001 | <0.001 | <0.001 | 0.350  | <0.001 | 0.026  | 0.004  | <0.001 | 0.839  | <0.001 | <0.001 | 0.176  | 0.394  | 0.008  |        |        |
| IL13     | <0.001 | <0.001 | <0.001 | <0.001 | <0.001 | 0.144  | 0.583  | 0.588  | <0.001 | <0.001 | 0.004  | 0.042  | 0.045  | 0.524  | 0.141  | 0.022  | <0.001 | <0.001 | 0.411  | <0.001 | 0.121  | 0.176  | 0.004  | 0.003  | 0.419  | 0.007  | 0.002  | 0.972  | 0.002  | 0.270  | 0.006  | 0.773  | 0.030  |        |
| IL4      | 0.451  | 0.115  | 0.009  | 0.760  | 0.760  | <0.001 | 0.408  | 0.938  | 0.491  | 0.003  | 0.009  | 0.196  | <0.001 | 0.706  | 0.194  | <0.001 | 0.984  | <0.001 | 0.093  | 0.288  | 0.675  | 0.046  | 0.614  | 0.460  | 0.339  | 0.520  | 0.075  | <0.001 | <0.001 | <0.001 | 0.513  | 0.756  | 0.913  |        |
| SLAMF7   | <0.001 | <0.001 | <0.001 | <0.001 | <0.001 | 0.005  | 0.168  | <0.001 | <0.001 | <0.001 | <0.001 | <0.001 | <0.001 | 0.762  | <0.001 | <0.001 | <0.001 | <0.001 | <0.001 | <0.001 | <0.001 | <0.001 | <0.001 | <0.001 | <0.001 | <0.001 | <0.001 | <0.001 | <0.001 | 0.102  | <0.001 | 0.006  | <0.001 |        |
| VEGFA    | 0.004  | 0.002  | <0.001 | 0.069  | 0.069  | <0.001 | 0.220  | 0.314  | 0.999  | 0.188  | 0.917  | 0.535  | 0.880  | 0.010  | <0.001 | 0.022  | 0.329  | 0.022  | 0.426  | 0.200  | 0.102  | <0.001 | 0.959  | 0.284  | 0.007  | 0.262  | 0.315  | <0.001 | <0.001 | <0.001 | 0.014  | 0.773  | 0.052  |        |
| VEGFB    | 0.527  | <0.001 | <0.001 | 0.003  | 0.003  | <0.001 | 0.026  | <0.001 | 0.583  | 0.051  | 0.467  | 0.609  | 0.095  | 0.004  | <0.001 | <0.001 |        |        |        |        |        |        |        |        |        |        |        |        |        |        |        |        |        |        |

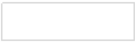

Supplement: f1 [file 8485726.f1.zip]
