# Supplementary material for: Pancancer Analysis Revealed the Value of RAC2 in Immunotherapy and Cancer Stem Cell
Source: Hindawi journal article supplement (doi:10.1155/2023/8485726), 2023-05-12
Supplement: f1 [file 8485726.f1.zip]

|          | ACC    | BLCA   | BRCA   | CESC   | CHOL   | COAD   | DLBC  | ESCA   | GBM    | HNSC   | KICH   | KIRC   | KIRP   | LAML   | LGG    | LIHC   | LUAD   | LUSC   | MESO   | OV     | PAAD   | PCPG   | PRAD   | READ   | SARC   | SKCM   | STAD   | TGCT   | THCA   | THYM   | UCEC   | UCS    | UVM    |
|----------|--------|--------|--------|--------|--------|--------|-------|--------|--------|--------|--------|--------|--------|--------|--------|--------|--------|--------|--------|--------|--------|--------|--------|--------|--------|--------|--------|--------|--------|--------|--------|--------|--------|
| B2M      | <0.001 | <0.001 | <0.001 | <0.001 | 0.087  | <0.001 | 0.023 | <0.001 | <0.001 | <0.001 | 0.002  | <0.001 | <0.001 | 0.280  | <0.001 | <0.001 | <0.001 | <0.001 | <0.001 | <0.001 | <0.001 | <0.001 | <0.001 | <0.001 | <0.001 | <0.001 | <0.001 | <0.001 | 0.049  | <0.001 | <0.001 | <0.001 |        |
| HLA-A    | <0.001 | <0.001 | <0.001 | <0.001 | 0.167  | <0.001 | 0.831 | <0.001 | <0.001 | <0.001 | <0.001 | <0.001 | <0.001 | <0.001 | <0.001 | <0.001 | <0.001 | <0.001 | 0.003  | <0.001 | <0.001 | <0.001 | <0.001 | <0.001 | <0.001 | <0.001 | <0.001 | <0.001 | 0.002  | <0.001 | <0.001 | <0.001 |        |
| HLA-B    | <0.001 | <0.001 | <0.001 | <0.001 | 0.123  | <0.001 | 0.861 | <0.001 | <0.001 | <0.001 | <0.001 | <0.001 | <0.001 | <0.001 | <0.001 | <0.001 | <0.001 | <0.001 | 0.001  | <0.001 | <0.001 | <0.001 | <0.001 | <0.001 | <0.001 | <0.001 | <0.001 | <0.001 | <0.001 | <0.001 | <0.001 | <0.001 |        |
| HLA-C    | <0.001 | <0.001 | <0.001 | <0.001 | 0.249  | <0.001 | 0.729 | 0.002  | <0.001 | <0.001 | 0.001  | <0.001 | <0.001 | <0.001 | <0.001 | <0.001 | <0.001 | <0.001 | <0.001 | <0.001 | <0.001 | <0.001 | <0.001 | <0.001 | <0.001 | <0.001 | <0.001 | <0.001 | <0.001 | <0.001 | <0.001 | <0.001 |        |
| HLA-E    | <0.001 | <0.001 | <0.001 | <0.001 | 0.038  | <0.001 | 0.032 | <0.001 | <0.001 | <0.001 | <0.001 | <0.001 | <0.001 | <0.001 | <0.001 | <0.001 | <0.001 | <0.001 | 0.007  | <0.001 | <0.001 | <0.001 | <0.001 | <0.001 | <0.001 | <0.001 | <0.001 | <0.001 | <0.001 | 0.009  | <0.001 | <0.001 | <0.001 |
| HLA-F    | <0.001 | <0.001 | <0.001 | <0.001 | 0.126  | <0.001 | 0.308 | <0.001 | <0.001 | <0.001 | <0.001 | <0.001 | <0.001 | <0.001 | <0.001 | <0.001 | <0.001 | <0.001 | 0.003  | <0.001 | <0.001 | <0.001 | <0.001 | <0.001 | <0.001 | <0.001 | <0.001 | <0.001 | <0.001 | 0.024  | <0.001 | <0.001 | <0.001 |
| HLA-G    | 0.135  | <0.001 | <0.001 | <0.001 | 0.186  | <0.001 | 0.194 | 0.007  | <0.001 | <0.001 | 0.024  | <0.001 | <0.001 | 0.010  | <0.001 | <0.001 | <0.001 | <0.001 | 0.016  | <0.001 | 0.020  | <0.001 | <0.001 | <0.001 | <0.001 | <0.001 | <0.001 | 0.001  | <0.001 | 0.001  | <0.001 | <0.001 | <0.001 |
| HLA-H    | 0.064  | <0.001 | <0.001 | <0.001 | 0.039  | <0.001 | 0.402 | 0.108  | 0.001  | <0.001 | 0.005  | <0.001 | <0.001 | <0.001 | <0.001 | <0.001 | <0.001 | <0.001 | <0.001 | <0.001 | <0.001 | <0.001 | 0.036  | <0.001 | <0.001 | <0.001 | <0.001 | <0.001 | <0.001 | <0.001 | <0.001 | <0.001 | <0.001 |
| HLA-J    | 0.166  | <0.001 | <0.001 | <0.001 | 0.916  | 0.001  | 0.522 | 0.269  | <0.001 | <0.001 | 0.001  | <0.001 | <0.001 | 0.764  | <0.001 | <0.001 | <0.001 | <0.001 | 0.013  | <0.001 | 0.069  | <0.001 | 0.733  | <0.001 | <0.001 | <0.001 | <0.001 | <0.001 | <0.001 | <0.001 | <0.001 | <0.001 | <0.001 |
| HLA-K    | 0.134  | <0.001 | <0.001 | 0.002  | 0.538  | <0.001 | 0.137 | 0.472  | 0.821  | 0.288  | 0.058  | <0.001 | <0.001 | 0.002  | <0.001 | 0.001  | <0.001 | 0.001  | 0.117  | 0.006  | 0.069  | <0.001 | <0.001 | 0.067  | 0.006  | <0.001 | 0.129  | 0.063  | <0.001 | 0.232  | <0.001 | 0.079  | 0.430  |
| HLA-L    | 0.689  | <0.001 | <0.001 | <0.001 | 0.645  | <0.001 | 0.044 | 0.109  | <0.001 | <0.001 | 0.062  | <0.001 | <0.001 | 0.032  | <0.001 | <0.001 | <0.001 | <0.001 | 0.018  | <0.001 | <0.001 | <0.001 | 0.001  | <0.001 | <0.001 | <0.001 | <0.001 | <0.001 | 0.008  | <0.001 | <0.001 | 0.003  |        |
| HLA-DRA  | <0.001 | <0.001 | <0.001 | <0.001 | 0.006  | <0.001 | 0.082 | <0.001 | <0.001 | <0.001 | <0.001 | <0.001 | <0.001 | <0.001 | <0.001 | <0.001 | <0.001 | <0.001 | <0.001 | <0.001 | <0.001 | <0.001 | <0.001 | <0.001 | <0.001 | <0.001 | <0.001 | <0.001 | 0.002  | <0.001 | <0.001 | <0.001 |        |
| HLA-DRB1 | <0.001 | <0.001 | <0.001 | <0.001 | 0.011  | <0.001 | 0.642 | <0.001 | <0.001 | <0.001 | <0.001 | <0.001 | <0.001 | <0.001 | <0.001 | <0.001 | <0.001 | <0.001 | <0.001 | <0.001 | <0.001 | <0.001 | <0.001 | <0.001 | <0.001 | <0.001 | <0.001 | <0.001 | 0.064  | <0.001 | <0.001 | <0.001 |        |
| HLA-DRB5 | <0.001 | <0.001 | <0.001 | <0.001 | 0.185  | <0.001 | 0.132 | <0.001 | <0.001 | <0.001 | <0.001 | <0.001 | <0.001 | <0.001 | <0.001 | <0.001 | <0.001 | <0.001 | <0.001 | <0.001 | <0.001 | <0.001 | <0.001 | <0.001 | <0.001 | <0.001 | <0.001 | <0.001 | 0.037  | <0.001 | 0.005  | <0.001 |        |
| HLA-DRB6 | <0.001 | <0.001 | <0.001 | <0.001 | 0.054  | <0.001 | 0.619 | 0.038  | <0.001 | <0.001 | <0.001 | <0.001 | <0.001 | <0.001 | <0.001 | <0.001 | <0.001 | <0.001 | <0.001 | <0.001 | <0.001 | <0.001 | <0.001 | <0.001 | <0.001 | <0.001 | <0.001 | <0.001 | 0.553  | <0.001 | <0.001 | <0.001 |        |
| HLA-DRB9 | 0.001  | <0.001 | <0.001 | <0.001 | 0.044  | <0.001 | 0.365 | <0.001 | <0.001 | <0.001 | 0.001  | <0.001 | <0.001 | 0.002  | <0.001 | <0.001 | <0.001 | <0.001 | <0.001 | <0.001 | <0.001 | <0.001 | <0.001 | <0.001 | <0.001 | <0.001 | <0.001 | <0.001 | 0.008  | <0.001 | 0.015  | <0.001 |        |
| HLA-DQA1 | <0.001 | <0.001 | <0.001 | <0.001 | <0.001 | <0.001 | 0.064 | <0.001 | <0.001 | <0.001 | <0.001 | <0.001 | <0.001 | 0.001  | <0.001 | <0.001 | <0.001 | <0.001 | <0.001 | <0.001 | <0.001 | <0.001 | <0.001 | <0.001 | <0.001 | <0.001 | <0.001 | <0.001 | 0.109  | <0.001 | <0.001 | <0.001 |        |
| HLA-DQB1 | <0.001 | <0.001 | <0.001 | <0.001 | <0.001 | <0.001 | 0.463 | <0.001 | <0.001 | <0.001 | <0.001 | <0.001 | <0.001 | <0.001 | <0.001 | <0.001 | <0.001 | <0.001 | <0.001 | <0.001 | <0.001 | <0.001 | <0.001 | <0.001 | <0.001 | <0.001 | <0.001 | <0.001 | 0.996  | <0.001 | <0.001 | <0.001 |        |
| HLA-DQA2 | <0.001 | <0.001 | <0.001 | <0.001 | 0.021  | <0.001 | 0.251 | <0.001 | 0.005  | <0.001 | <0.001 | <0.001 | <0.001 | 0.112  | <0.001 | <0.001 | <0.001 | <0.001 | <0.001 | <0.001 | <0.001 | <0.001 | <0.001 | <0.001 | <0.001 | <0.001 | <0.001 | <0.001 | 0.677  | <0.001 | 0.144  | <0.001 |        |
| HLA-DQB2 | <0.001 | <0.001 | <0.001 | <0.001 | 0.004  | <0.001 | 0.299 | <0.001 | <0.001 | <0.001 | <0.001 | <0.001 | <0.001 | 0.004  | <0.001 | <0.001 | <0.001 | <0.001 | <0.001 | <0.001 | <0.001 | 0.007  | <0.001 | <0.001 | <0.001 | <0.001 | <0.001 | <0.001 | 0.649  | <0.001 | 0.082  | <0.001 |        |
| HLA-DQB3 |        | 0.701  | 0.379  | 0.472  | 0.092  | 0.004  | 0.781 | 0.159  | 0.579  | 0.327  | 0.526  | 0.455  | 0.992  | 0.126  | 0.503  | 0.355  | 0.542  | 0.859  | 0.543  | 0.993  | 0.589  |        | 0.566  | 0.291  | 0.121  | 0.475  | 0.372  | 0.663  | 0.133  | 0.304  | 0.740  |        | 0.683  |
| HLA-DPA1 | <0.001 | <0.001 | <0.001 | <0.001 | <0.001 | <0.001 | 0.117 | <0.001 | <0.001 | <0.001 | <0.001 | <0.001 | <0.001 | <0.001 | <0.001 | <0.001 | <0.001 | <0.001 | <0.001 | <0.001 | <0.001 | <0.001 | <0.001 | <0.001 | <0.001 | <0.001 | <0.001 | <0.001 | 0.010  | <0.001 | <0     |        |        |
