# Supplementary material for: Pancancer Analysis Revealed the Value of RAC2 in Immunotherapy and Cancer Stem Cell
Source: Hindawi journal article supplement (doi:10.1155/2023/8485726), 2023-05-12
Supplement: f1 [file 8485726.f1.zip]

| Gene     | Module    | MM_R         | MM_pvalue |
|----------|-----------|--------------|-----------|
| FOXP1    | turquoise | 0.911484968  | 0.000622  |
| PAX1     | turquoise | 0.972492857  | 1.11E-05  |
| ATRNL1   | turquoise | 0.910176045  | 0.000654  |
| ZBED8    | turquoise | 0.95645577   | 5.44E-05  |
| S100A14  | turquoise | 0.882311815  | 0.001638  |
| PDE7B    | turquoise | -0.875256126 | 0.001994  |
| DSP      | turquoise | 0.987578091  | 6.95E-07  |
| CBS      | turquoise | 0.905579355  | 0.000776  |
| DUSP10   | turquoise | -0.831524515 | 0.005458  |
| IRF1     | turquoise | -0.907099412 | 0.000734  |
| MMP12    | turquoise | -0.922186303 | 0.000401  |
| UNC5B    | turquoise | 0.951169862  | 8.08E-05  |
| GPC4     | turquoise | 0.889566384  | 0.001321  |
| ARHGAP42 | turquoise | 0.923012402  | 0.000386  |
| REL      | turquoise | -0.815838838 | 0.007333  |
| CROT     | turquoise | 0.81069546   | 0.008032  |
| SIX4     | turquoise | 0.887090771  | 0.001424  |
| TARBP1   | turquoise | 0.907169123  | 0.000732  |
| MTCL1    | turquoise | 0.930634028  | 0.00027   |
| SORBS2   | turquoise | 0.924038036  | 0.000369  |
| C4B      | turquoise | 0.949219805  | 9.24E-05  |
| PKP1     | turquoise | 0.845956186  | 0.004049  |
| C4A      | turquoise | 0.949007061  | 9.38E-05  |
| CCNL1    | turquoise | -0.945591037 | 0.000117  |
| OXCT1    | turquoise | 0.831221878  | 0.005491  |
| DUOX1    | turquoise | 0.847819948  | 0.003888  |
| MIR944   | turquoise | 0.944729457  | 0.000124  |
| KRT10    | turquoise | -0.80059429  | 0.009534  |
| SPIB     | turquoise | -0.887666417 | 0.001399  |
| MIR4420  | turquoise | -0.870024795 | 0.00229   |
| NRCAM    | turquoise | 0.843784002  | 0.004243  |
| PGAP1    | turquoise | 0.936599339  | 0.000199  |
| NDRG3    | turquoise | 0.832302356  | 0.005375  |
| PCSK6    | turquoise | 0.802672583  | 0.009211  |
| C8orf37  | turquoise | 0.852832613  | 0.003476  |
| CCDC69   | turquoise | -0.905289193 | 0.000784  |
| PAX9     | turquoise | 0.9641769    | 2.77E-05  |
| VPS35    | turquoise | 0.876199431  | 0.001944  |
| SRSF7    | turquoise | -0.896672809 | 0.001054  |
| CDS1     | turquoise | 0.838832346  | 0.004709  |
| RPGRIP1L | turquoise | 0.865747286  | 0.002554  |
| NPNT     | turquoise | 0.95805467   | 4.78E-05  |
| CD83     | turquoise | -0.916129112 | 0.000518  |
| MYO10    | turquoise | 0.948067176  | 9.99E-05  |
| DPH6     | turquoise | 0.916980723  | 0.0005    |
| DUOXA1   | turquoise | 0.863748406  | 0.002684  |
| HSPA4L   | turquoise | 0.891825951  | 0.001231  |
| ZNF385D  | turquoise | -0.955132279 | 6.03E-05  |
| MDK      | turquoise | 0.9534092    | 6.87E-05  |
| MIR1299  | turquoise | 0.915280475  | 0.000536  |
