# Supplementary material for: Pancancer Analysis Revealed the Value of RAC2 in Immunotherapy and Cancer Stem Cell
Source: Hindawi journal article supplement (doi:10.1155/2023/8485726), 2023-05-12
Supplement: f2 [file 8485726.f2.zip]

| Abbr      | Full name                                                        |
|-----------|------------------------------------------------------------------|
| TCGA-ACC  | Adrenocortical carcinoma                                         |
| TCGA-BLCA | Bladder Urothelial Carcinoma                                     |
| TCGA-BRCA | Breast invasive carcinoma                                        |
| TCGA-CESC | Cervical squamous cell carcinoma and endocervical adenocarcinoma |
| TCGA-CHOL | Cholangiocarcinoma                                               |
| TCGA-COAD | Colon adenocarcinoma                                             |
| TCGA-DLBC | Lymphoid Neoplasm Diffuse Large B-cell Lymphoma                  |
| TCGA-ESCA | Esophageal carcinoma                                             |
| TCGA-GBM  | Glioblastoma multiforme                                          |
| TCGA-HNSC | Head and Neck squamous cell carcinoma                            |
| TCGA-KICH | Kidney Chromophobe                                               |
| TCGA-KIRC | Kidney renal clear cell carcinoma                                |
| TCGA-KIRP | Kidney renal papillary cell carcinoma                            |
| TCGA-LAML | Acute Myeloid Leukemia                                           |
| TCGA-LGG  | Brain Lower Grade Glioma                                         |
| TCGA-LIHC | Liver hepatocellular carcinoma                                   |
| TCGA-LUAD | Lung adenocarcinoma                                              |
| TCGA-LUSC | Lung squamous cell carcinoma                                     |
| TCGA-MESO | Mesothelioma                                                     |
| TCGA-OV   | Ovarian serous cystadenocarcinoma                                |
| TCGA-PAAD | Pancreatic adenocarcinoma                                        |
| TCGA-PCPG | Pheochromocytoma and Paraganglioma                               |
| TCGA-PRAD | Prostate adenocarcinoma                                          |
| TCGA-READ | Rectum adenocarcinoma                                            |
| TCGA-SARC | Sarcoma                                                          |
| TCGA-STAD | Stomach adenocarcinoma                                           |
| TCGA-SKCM | Skin Cutaneous Melanoma                                          |
| TCGA-TGCT | Testicular Germ Cell Tumors                                      |
| TCGA-THCA | Thyroid carcinoma                                                |
| TCGA-THYM | Thymoma                                                          |
| TCGA-UCEC | Uterine Corpus Endometrial Carcinoma                             |
| TCGA-UCS  | Uterine Carcinosarcoma                                           |
| TCGA-UVM  | Uveal Melanoma                                                   |
