# Supplementary figures and images for: Pancancer Analysis Revealed the Value of RAC2 in Immunotherapy and Cancer Stem Cell
Source: Hindawi journal article supplement (doi:10.1155/2023/8485726), 2023-05-12

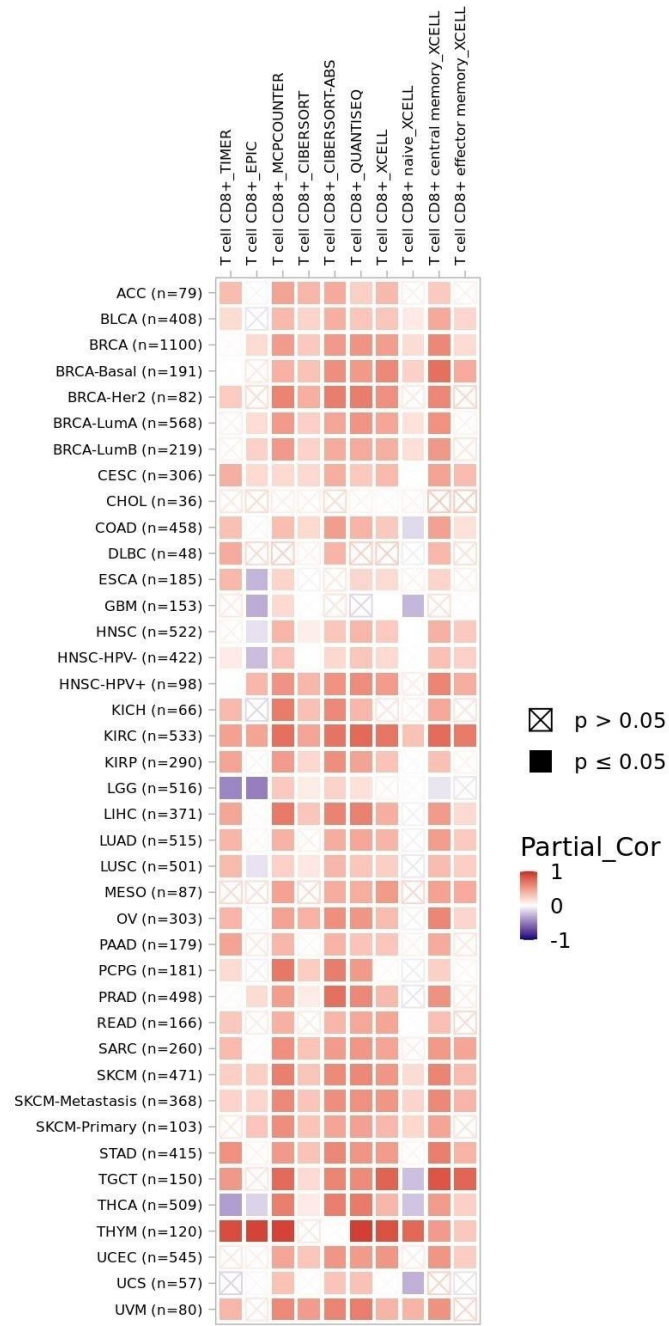

Supplement: f2 [file 8485726.f2.zip]

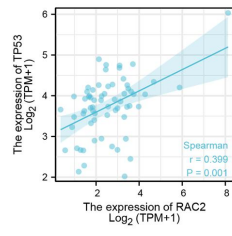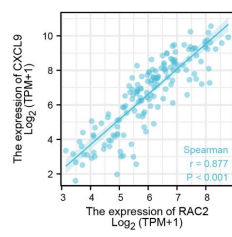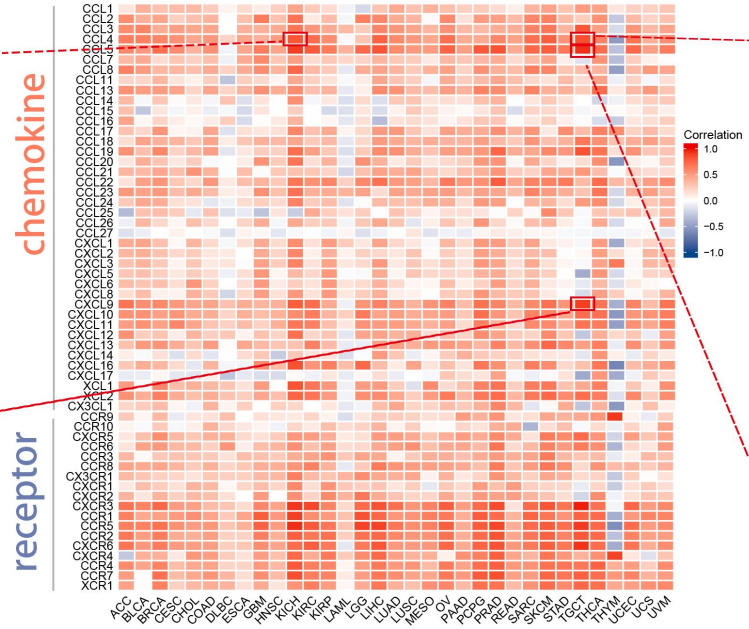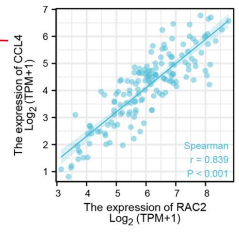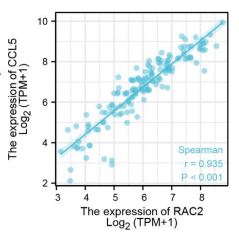

Supplement: f2 [file 8485726.f2.zip]

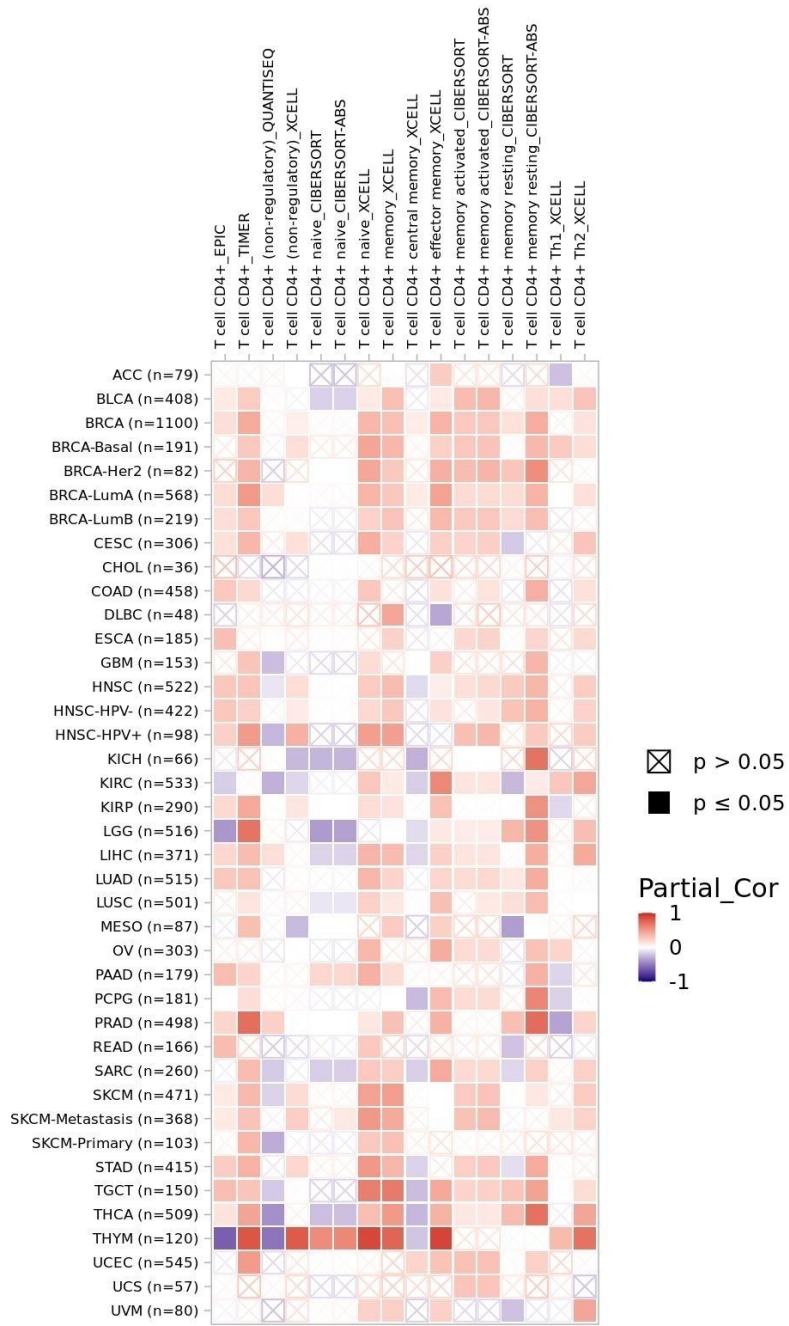

Supplement: f2 [file 8485726.f2.zip]

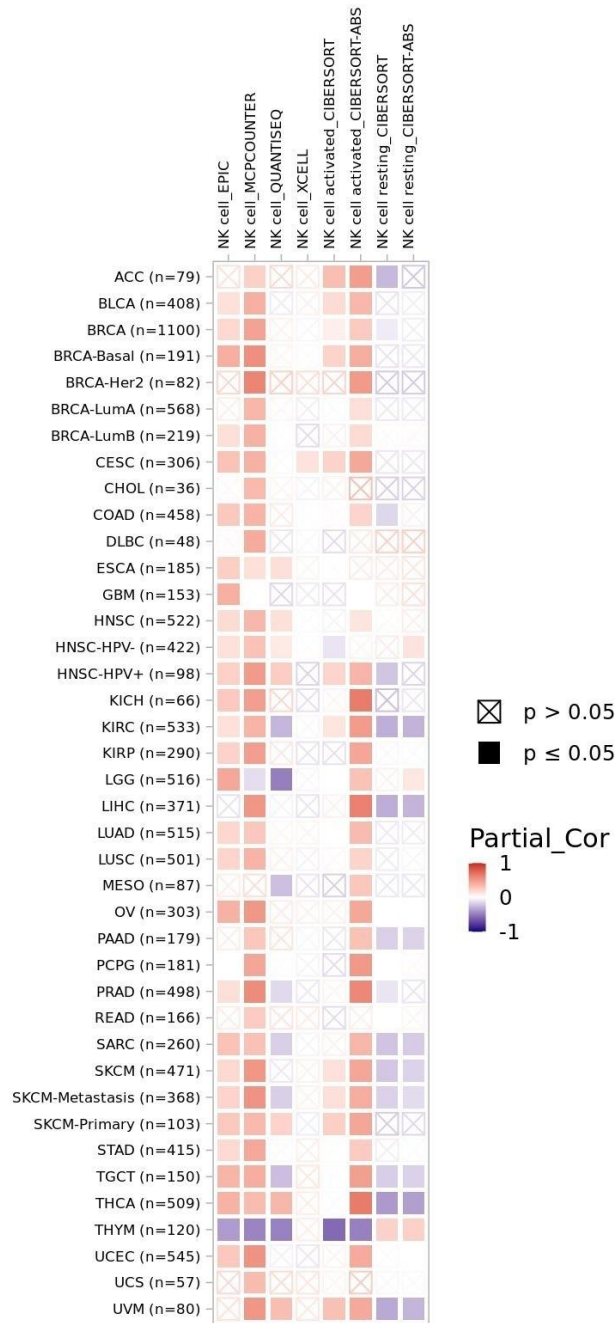

Supplement: f2 [file 8485726.f2.zip]

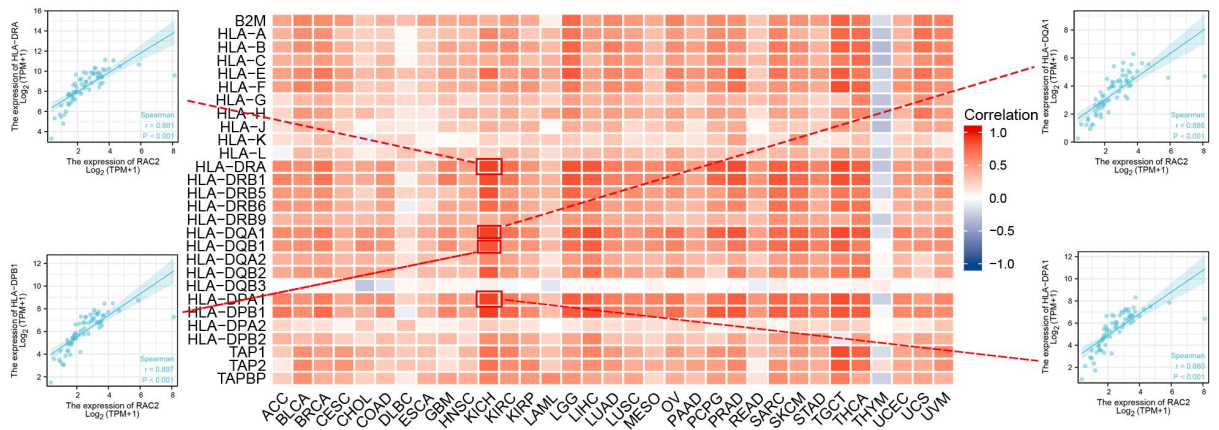

Supplement: f2 [file 8485726.f2.zip]

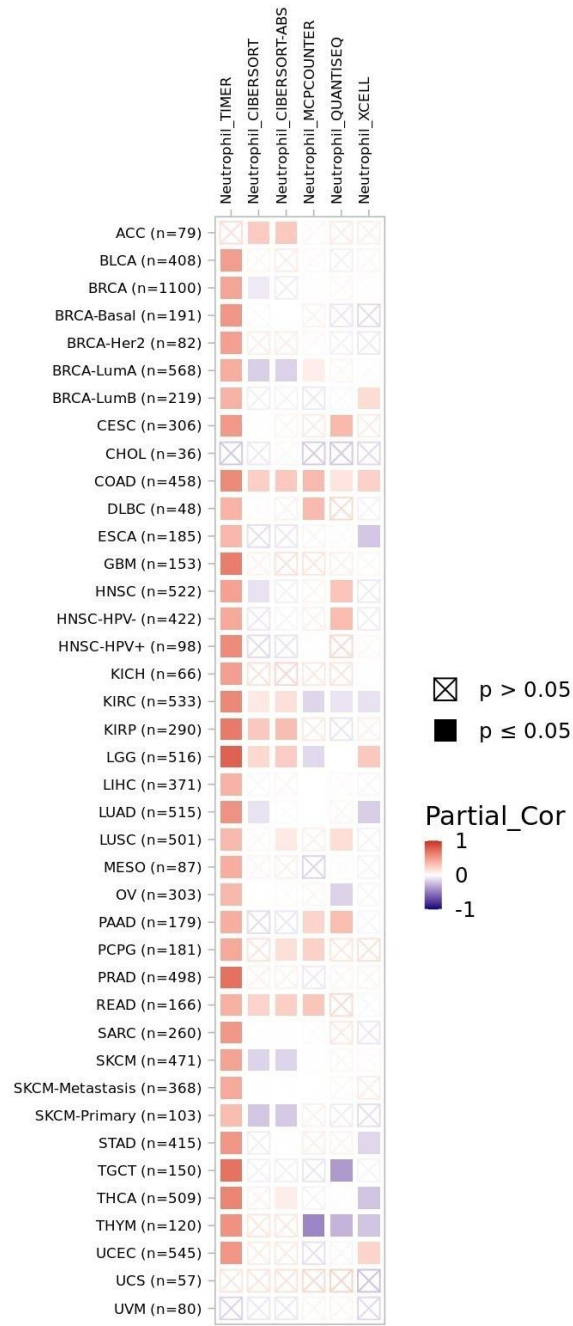

Supplement: f2 [file 8485726.f2.zip]

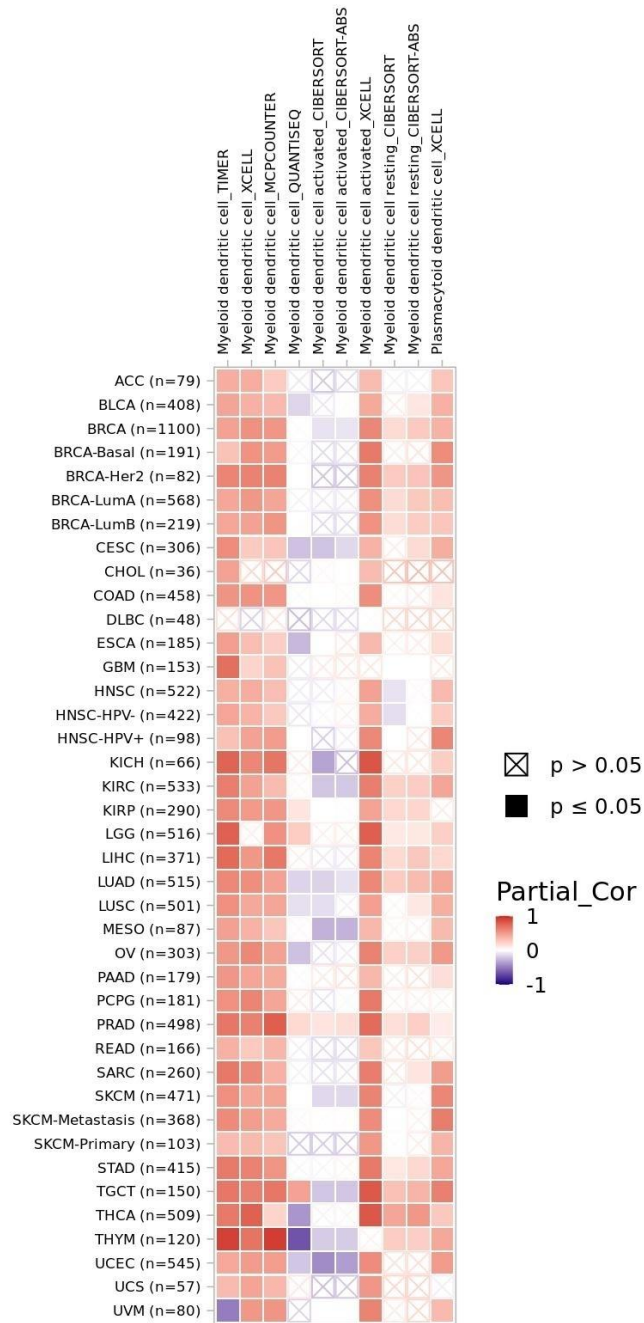

Supplement: f2 [file 8485726.f2.zip]

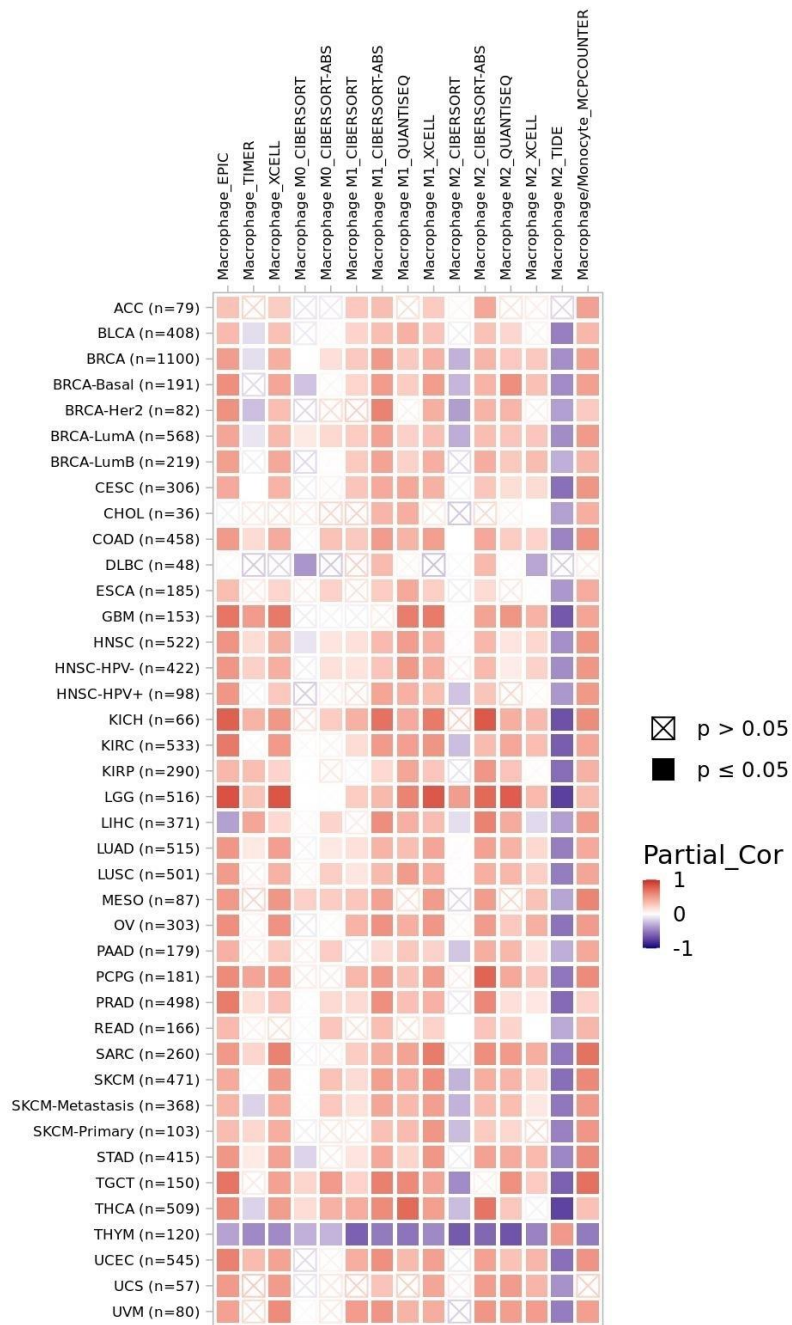

Supplement: f2 [file 8485726.f2.zip]

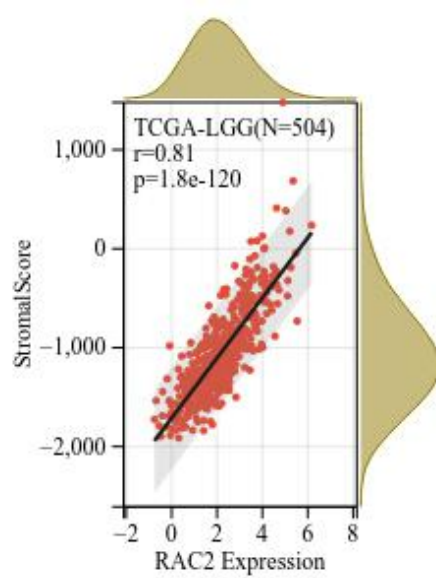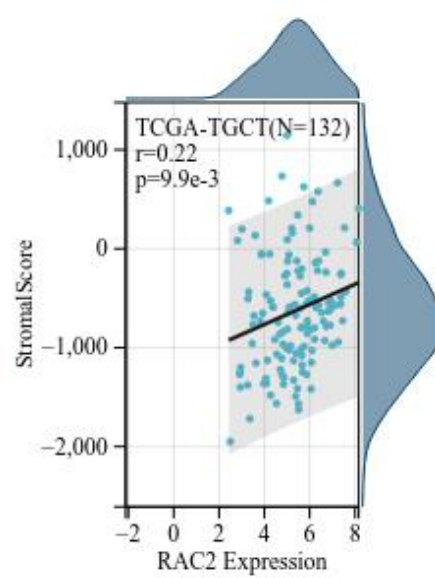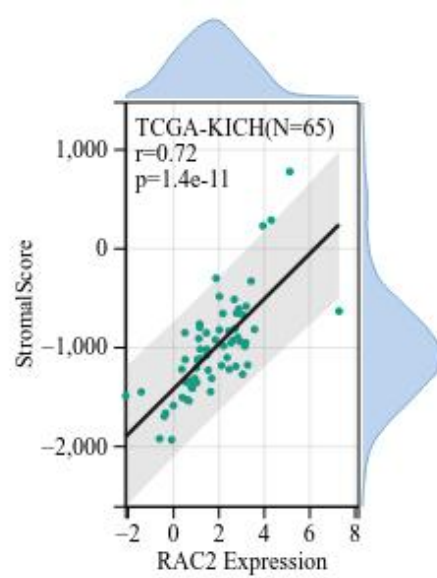

Supplement: f2 [file 8485726.f2.zip]
